# Supplementary material for: HomeStyles, A Web-Based Childhood Obesity Prevention Program for Families With Preschool Children: Protocol for a Randomized Controlled Trial
Source: PubMed Central journal article supplement (PMC5424124; doi:10.2196/resprot.7544), 2017-04-25
Supplement: resprot_v6i4e73_app1.pdf [file resprot_v6i4e73_app1.pdf]

**Multimedia Appendix 2. HomeStyles study measures.**

| <b>Measures</b>                                            | <b># of Items</b> | <b>Scale Type</b>                                              | <b>Possible Score Range</b> |
|------------------------------------------------------------|-------------------|----------------------------------------------------------------|-----------------------------|
| <b>Individual (Intrapersonal) Measures</b>                 |                   |                                                                |                             |
| <b>Parents</b>                                             |                   |                                                                |                             |
| Health Status [99, 100]                                    | 1                 | 5-point excellence rating <sup>A</sup>                         | 1-5                         |
| BMI                                                        | 1                 | BMI units                                                      | 0-no limit                  |
| <b>Behaviors <sup>M</sup></b>                              |                   |                                                                |                             |
| Fruit/Vegetable (servings/day) [108-111]                   | 7                 | 6-point servings eaten scale <sup>B</sup>                      | 0-12.9                      |
| Milk (servings/day) [106-111, 118]                         | 1                 | 9-point servings drank scale <sup>C</sup>                      | 0-8                         |
| Sugar-sweetened Beverages [106, 107] (servings/day)        | 4                 | 9-point servings eaten scale <sup>C</sup>                      | 0-4.6                       |
| Percent Total Calories from Fat [108-111]                  | 17                | 5-point servings eaten scale <sup>D</sup>                      | 0-100                       |
| Physical Activity Level [112-114]                          | 3                 | 8-point exercise scale <sup>E</sup>                            | 0-42                        |
| Screentime [98, 115] (minutes/day)                         | 1                 | time/day                                                       | 0-1440                      |
| Sleep Duration (minutes/day) [116, 117]                    | 1                 | time/day                                                       | 0-1440                      |
| <b>Children</b>                                            |                   |                                                                |                             |
| Health Status [99, 100]                                    | 1                 | 5-point excellence rating <sup>A</sup>                         | 1-5                         |
| BMI percentile [104]                                       | 1                 | percentile                                                     | 0-100                       |
| <b>Behaviors <sup>M</sup></b>                              |                   |                                                                |                             |
| Fruit/Vegetable Juice (servings/day) [106-111, 118]        | 2                 | 9-point servings drank scale <sup>C</sup>                      | 0-2.3                       |
| Milk (servings/day) [106-111, 118]                         | 1                 | 9-point servings drank scale <sup>C</sup>                      | 0-8                         |
| Sugar-sweetened Beverage (servings/day) [106-111, 118]     | 2                 | 9-point servings drank scale <sup>C</sup>                      | 0-2.3                       |
| Physical Activity Level [112]                              | 3                 | 8-point Exercise scale <sup>E</sup>                            | 0-42                        |
| Screentime minutes/day [98, 115]                           | 1                 | minutes                                                        | 0-1440                      |
| Sleep Duration (minutes/day) [116, 117]                    | 1                 | minutes                                                        | 0-1440                      |
| <b>Family/Social Interactions (Interpersonal) Measures</b> |                   |                                                                |                             |
| <b>Food-Related Lifestyle Practices <sup>L</sup></b>       |                   |                                                                |                             |
| Family Meal frequency/week [119]                           | 3                 | 0-7 days for breakfast, lunch, dinner; score is sum of 3 meals | 0-21                        |
| <b>Family Meal Location [120-122]</b>                      |                   |                                                                |                             |
| In Car (days/week)                                         | 1                 | 0-7 days                                                       | 0-7                         |
| At Fast Food Restaurant (days/week)                        | 1                 | 0-7 days                                                       | 0-7                         |
| At Dining Table (days/week)                                | 1                 | 0-7 days                                                       | 0-7                         |
| In Front of TV (days/week)                                 | 1                 | 0-7 days                                                       | 0-7                         |
| Media Device Use at Family Meals [98,                      | 1                 | 0-7 days                                                       | 0-7                         |

|                                                                        |   |                                       |     |
|------------------------------------------------------------------------|---|---------------------------------------|-----|
| 120, 123] (days/week)                                                  |   |                                       |     |
| TV Use at Family Meals & Snacking Occasions [98, 120, 123] (days/week) | 1 | 0-7 days                              | 0-7 |
| Family Mealtime Emotional Environment [122, 123]                       | 2 | 5-point agreement rating <sup>F</sup> | 1-5 |
| Family Meals are Planned [124-127]                                     | 2 | 5-point agreement rating <sup>F</sup> | 1-5 |
| Parent Family Meal Preparation Self-Efficacy [125]                     | 2 | 5-point agreement rating <sup>F</sup> | 1-5 |
| Parent Modeling of Healthy Eating [30, 128, 129]                       | 4 | 5-point agreement rating <sup>F</sup> | 1-5 |

**Parent Self-efficacy for Food-Related Childhood Obesity-Preventive Practices<sup>M</sup>**  
[98, 133, 134]

|                                                                   |   |                                        |     |
|-------------------------------------------------------------------|---|----------------------------------------|-----|
| Self-efficacy for Keeping Child's Weight Healthy                  | 1 | 5-point confidence rating <sup>G</sup> | 1-5 |
| Self-efficacy for Letting Child Decide Amounts to Eat at Mealtime | 1 | 5-point confidence rating <sup>G</sup> | 1-5 |
| Self-efficacy for Getting Child to Eat Breakfast                  | 1 | 5-point confidence rating <sup>G</sup> | 1-5 |
| Self-efficacy for Getting Child to Eat Fruits & Vegetables        | 1 | 5-point confidence rating <sup>G</sup> | 1-5 |
| Self-efficacy for Getting Child to Drink Fewer Sugary Drinks      | 1 | 5-point confidence rating <sup>G</sup> | 1-5 |
| Self-efficacy for Separating TV Watching and Eating               | 1 | 5-point confidence rating <sup>G</sup> | 1-5 |

**Physical Activity-Related Lifestyle Practices<sup>L</sup>**

|                                                                             |   |                                       |     |
|-----------------------------------------------------------------------------|---|---------------------------------------|-----|
| Parent: Child Co-Physical Activity (days/week) [98]                         | 2 | 8-point modeling scale <sup>H</sup>   | 0-7 |
| Parent Modeling of Physical Activity (days/week) [114, 120, 123, 128, 130]  | 2 | 8-point modeling scale <sup>H</sup>   | 0-7 |
| Parent Modeling of Sedentary Activity (days/week) [114, 120, 123, 128, 130] | 2 | 8-point modeling scale <sup>H</sup>   | 0-7 |
| Parent Encouragement of Child Physical Activity [98, 123, 128, 131, 132]    | 5 | 5-point agreement rating <sup>F</sup> | 1-5 |

**Parent Self-Efficacy for Physical-Activity Related Childhood Obesity-Preventive Practices<sup>M</sup>**  
[98, 133, 134]

|                                                         |   |                                        |     |
|---------------------------------------------------------|---|----------------------------------------|-----|
| Self-efficacy for Getting Child to Be Physically Active | 1 | 5-point confidence rating <sup>G</sup> | 1-5 |
| Self-efficacy for Getting Child to Limit Screentime     | 1 | 5-point confidence rating <sup>G</sup> | 1-5 |

|                                                                                   |   |                                                                                                                                             |      |
|-----------------------------------------------------------------------------------|---|---------------------------------------------------------------------------------------------------------------------------------------------|------|
| Self-efficacy for Getting Child Enough Sleep                                      | 1 | 5-point confidence rating <sup>G</sup>                                                                                                      | 1-5  |
| <b>Parent Values Related to Obesity-Preventive Practices<sup>M</sup></b>          |   |                                                                                                                                             |      |
| Healthy Eating Outcome Expectations [125, 135]                                    | 6 | 5-point agreement rating <sup>F</sup>                                                                                                       | 1-5  |
| Physical Activity Outcome Expectations [125, 135]                                 | 6 | 5-point agreement rating <sup>F</sup>                                                                                                       |      |
| Value Placed on Modeling Physical Activity [98, 123, 130-132]                     | 2 | 5-point agreement rating <sup>F</sup>                                                                                                       | 1-5  |
| Valued Placed on Not Modeling Sedentary Behavior [98]                             | 1 | 5-point agreement rating <sup>F</sup>                                                                                                       | 1-5  |
| Value Placed on Physical Activity for Children [131, 132]                         | 2 | 5-point agreement rating <sup>F</sup>                                                                                                       | 1-5  |
| <b>Home Physical Environment Measures<sup>L</sup></b>                             |   |                                                                                                                                             |      |
| <b>Household Food Availability</b> [106, 107, 109, 118, 136]                      |   |                                                                                                                                             |      |
| Fruits/Vegetables (servings/household member/week)                                | 7 | 9-point servings scale <sup>I</sup>                                                                                                         | †    |
| Salty/fatty snacks (servings/household member/week)                               | 4 | 9-point servings scale <sup>I</sup>                                                                                                         | 0-32 |
| Sugar-sweetened Beverages (servings/household member/week)                        | 4 | 9-point servings scale <sup>I</sup>                                                                                                         | 0-32 |
| Breakfast Foods (servings/household member/week)                                  | 3 | 9-point servings scale <sup>I</sup>                                                                                                         | 0-24 |
| Milk (servings/household member/week)                                             | 1 | 9-point servings scale <sup>I</sup>                                                                                                         | 0-8  |
| <b>Physical Activity Environment<sup>L</sup></b> [97]                             |   |                                                                                                                                             |      |
| Indoor Home Space & Supports For Physical Activity                                | 6 | Varies by item; 2 items are counts; 1 item is a 5-point agreement rating <sup>F</sup> ; 3 items are 5-point occurrence ratings <sup>J</sup> | 1-5  |
| Outdoor/Yard Space & Supports For Physical Activity                               | 4 | 5-point agreement rating <sup>F</sup>                                                                                                       | 1-5  |
| Neighborhood Space & Supports For Physical Activity                               | 4 | 5-point agreement rating <sup>F</sup>                                                                                                       | 1-5  |
| Neighborhood Environment Safety                                                   | 2 | 5-point agreement rating <sup>F</sup>                                                                                                       | 1-5  |
| Frequency of Active Play Outdoors                                                 | 2 | 5-point occurrence ratings <sup>J</sup>                                                                                                     | 1-5  |
| <b>Media Environment<sup>L</sup></b>                                              |   |                                                                                                                                             |      |
| Total Number of Inactive Media Devices (including TV) in the Home [120, 123, 128] | 6 | Total devices <sup>K</sup>                                                                                                                  | 0-66 |

|                                                                                                                                       |   |         |        |
|---------------------------------------------------------------------------------------------------------------------------------------|---|---------|--------|
| Time Children are Allowed to Watch TV/Movies & Use Inactive Media Devices (e.g., computers, tablets, smart phones) [98] (minutes/day) | 1 | minutes | 0-1440 |
| Total Time TV is on When No One is Watching [98, 123] (minutes/day)                                                                   | 1 | minutes | 0-1440 |

<sup>A</sup> 5-point Excellence Rating: poor, fair, good, very good, excellent; scored 1 to 5 respectively; higher score indicates better health.

<sup>B</sup> 6-point Fruit/Vegetable Servings Rating: <1 serving/week, 1 serving /week, 2 to 3 servings/week, 4 to 6 servings/week, 1 serving/day, 2 or more servings/day; scored 0 to 5 respectively; scale scoring algorithm is protected by copyright and described in detail elsewhere [109, 110].

<sup>C</sup> 9-point Sugar-sweetened Beverage Servings Rating: <1 time/week, 1 day/week, 2 days/week, 3 days/week, 4 days/week, 5 days/week, 6 days/week, 7 days/week, >1 time/day; scored 0 to 8 respectively; daily sugar intake from these beverages is item score multiplied by grams of sugar in a typical serving divided 7 days/week [106, 107].

<sup>D</sup> 5-point Fatty Food Servings Rating: 1 time/month or less, 2 to 3 times/month, 1 to 2 times/week, 3 to 4 times/week, 5 or more times/week; scored 0 to 4 respectively; scale scoring algorithm is protected by copyright and described in detail elsewhere [109, 137].

<sup>E</sup> 8-point Exercise Days/week: 0, 1, 2, 3, 4, 5, 6, and 7; days/week weighted by exercise intensity (weights of 1, 2, 3 for walking, moderate, and vigorous activity, respectively) and summed to create scale score; higher scale score indicates greater activity level.

<sup>F</sup> 5-point Agreement Rating: strongly disagree, disagree, neither agree nor disagree, agree, strongly agree; scored 1 to 5 respectively with scoring reversed for negatively worded statements; scale score equals average of item scores; higher scale score indicates greater expression of the trait.

<sup>G</sup> 5-point Confidence Rating: not at all confident, not confident, confident, quite confident, very confident; scored 1 to 5 respectively; higher scale score indicates greater confidence.

<sup>H</sup> 8-point Modeling Days/week: 0 (almost never), 1, 2, 3, 4, 5, 6, and 7; days averaged to create scale score; higher score indicates more frequent modeling.

<sup>I</sup> 9-point Household Servings Rating: <1 time/week, 1 day/week, 2 days/week, 3 days/week, 4 days/week, 5 days/week, 6 days/week, 7 days/week, >1 time/day; scored 0 to 8 respectively.

<sup>J</sup> 5-point Occurrence Rating: almost never, 1-2 times/week; 3 to 4 times/week, 5 to 6 times/week, every day; scored 1 to 5 respectively; scale score equals average of item scores; higher scale score indicates greater occurrence of behavior.

<sup>K</sup> 11-point frequency scale for each media device: 1=1 to 10=10, 11=more than 10.

<sup>L</sup> Primary outcome measures.

<sup>M</sup> Secondary outcome measures.
